# Supplementary material for: Failure of phylogeny inferred from multilocus sequence typing to represent bacterial phylogeny
Source: PubMed Central journal article supplement (PMC5495804; doi:10.1038/s41598-017-04707-4), 2017-07-03
Supplement: 41598_2017_4707_MOESM1_ESM.pdf [file 41598_2017_4707_MOESM1_ESM.pdf]

# Failure of phylogeny inferred from multilocus sequence typing to represent bacterial phylogeny

Alan K. L. Tsang<sup>1</sup>, Hwei Huih Lee<sup>1</sup>, Siu-Ming Yiu<sup>2</sup>, Susanna K. P. Lau<sup>1,3,4,5,6\*</sup>, Patrick C. Y.

Woo<sup>1,3,4,5,6\*</sup>

Supplementary Table S1. Bacteria used in study

Supplementary Table S1

| Bacteria and strains             | GenBank accession no. | Remarks                                                                                                                                      |
|----------------------------------|-----------------------|----------------------------------------------------------------------------------------------------------------------------------------------|
| <i>Burkholderia pseudomallei</i> |                       |                                                                                                                                              |
| K96243                           | BX571965              | Isolated from a 34-year-old female diabetic patient with melioidosis in Thailand in 1996                                                     |
| 1710b                            | CP000124              | Opportunistic human pathogen, isolated from blood culture of a 55-year-old diabetic patient with primary melioidosis in Thailand in 1999     |
| 668                              | CP000570              | Isolated from the blood of a 53 year old male patient with severe melioidosis encephalomyelitis in Darwin, Australia in 1995.                |
| 1106a                            | CP000572              | Isolated in 1993 in Ubon Ratchathani, Thailand from pus aspirated from liver abscess from a 23-year old female rice farmer                   |
| 1026b                            | CP002833              | Isolated from the blood of a 29-year-old female patient with septicemic melioidosis with skin, soft tissue, spleen and joint involvement     |
| BPC006                           | CP003781              | Isolated from blood of patient with type I diabetes and multiple abscesses, a melioidosis patient in Hainan, China                           |
| MSHR305                          | CP006470              | Isolated in 1994 during an autopsy of a fatal melioidosis encephalomyelitis case at the Royal Darwin Hospital, Northern Territory, Australia |
| NCTC 13179                       | CP003976              | Isolated from human skin ulcer in Australia                                                                                                  |
| NCTC 13178                       | CP004001              | Isolated from human post mortem brain in Australia                                                                                           |
| NAU20B-16                        | CP004003              | Isolated from soil in Australia                                                                                                              |
| MSHR511                          | CP004023              | Isolated from throat of goat in Australia                                                                                                    |
| MSHR146                          | CP004042              | Isolated from right udder of goat in Australia                                                                                               |
| MSHR520                          | CP004368              | Isolated from human blood in Australia                                                                                                       |
| BDP                              | CP009209              | Isolated from human brain in Darwin, Northern Territory, Australia                                                                           |
| BSR                              | CP009128              | -                                                                                                                                            |
| HB PUB10303a                     | CP008894              | Isolated from sputum of a 40 year old male with melioidosis through tracheal suction in Thailand                                             |
| HB PUB10134a                     | CP008911              | Isolated from human sputum through tracheal suction of human in Thailand                                                                     |
| MSHR5858                         | CP008892              | Isolated from human sputum in Australia                                                                                                      |
| MSHR5848                         | CP008909              | Isolated from human sputum in Australia                                                                                                      |
| MSHR5855                         | CP008784              | Isolated from human sputum in Australia                                                                                                      |
| BGR                              | CP008834              | Collected from Thailand                                                                                                                      |

|                             |          |                                                                                                                                    |
|-----------------------------|----------|------------------------------------------------------------------------------------------------------------------------------------|
| Mahidol-1106a               | CP008781 | Collected from Thailand                                                                                                            |
| MSHR1655                    | CP008780 | Isolated from a patient with melioidosis in Darwin, Australia in 2000                                                              |
| 576                         | CP008777 | isolated from a 49 year old woman suffering from fatal melioidosis in Thailand                                                     |
| PHLS 112                    | CP009585 | A human isolate obtained from northeast Thailand in 1992                                                                           |
| Pasteur 52237               | CP009899 | Isolated from Vietnam                                                                                                              |
| NAU35A-3                    | CP004377 | Isolated from soil in Australia                                                                                                    |
| MHSR62                      | CP009235 | Human clinical isolate from Australia                                                                                              |
| B03                         | CP009151 | Isolated from environmental sample in Australia                                                                                    |
| TSV 48                      | CP009161 | Isolated from environmental sample in Australia                                                                                    |
| K 42                        | CP009162 | Isolated from environmental sample in Australia                                                                                    |
| A79A                        | CP009165 | Isolated from environmental sample in Australia                                                                                    |
| vgh07                       | CP010973 | Isolated from a melioidosis patient with arthro-osteomyelitis in Taiwan.                                                           |
| 406e                        | CP009298 | Collected from human sample in Thailand                                                                                            |
| MSHR840                     | CP009474 | Isolated from human brain tissue in Ipswich, Australia                                                                             |
| MSHR491                     | CP009485 | Isolated from community water supply storage tank at Northern Territory, Australia                                                 |
| MSHR2543                    | CP009478 | Isolated from Australia                                                                                                            |
| 7894                        | CP009535 | A human isolate obtained from Ecuador in 1962                                                                                      |
| MSHR668                     | CP009545 | Isolated from the blood of a 53 year old male patient with severe melioidosis encephalomyelitis in Darwin, Australia in 1995       |
| PB08298010                  | CP009551 | Isolated from human clinical sample from Arizona, USA                                                                              |
| MSHR346                     | CP008764 | Isolated from sputum of a melioidosis patient admitted to Royal Darwin Hospital, Northern Territory, Australia in 1995             |
| MSHR2243                    | CP009270 | Isolated from clinical human sample in Australia                                                                                   |
| MSHR1153                    | CP009271 | Isolated from clinical human sample in Australia                                                                                   |
| <i>Campylobacter jejuni</i> |          |                                                                                                                                    |
| NCTC 11168                  | AL111168 | Subspecies jejuni, isolated from clinical sample in the UK in 1977                                                                 |
| RM1221                      | CP000025 | Isolated from chicken carcasses at the retail level in the US                                                                      |
| 81-176                      | CP000538 | Subspecies jejuni, isolated from campylobacteriosis specimens related to consumption of raw milk at a Minnesota farm in 1985       |
| 81116                       | CP000814 | Subspecies jejuni, isolated from a waterborne outbreak in 1982 and used as a laboratory strain                                     |
| IA3902                      | CP001876 | Subspecies jejuni, isolated from an aborted ovine fetus                                                                            |
| M1                          | CP001900 | Subspecies jejuni, isolated from the diarrheic stools of one research team member 9 days after visiting a poultry processing plant |
| CG8421                      | CP005388 | Subspecies jejuni, clinical isolate from a patient in Thailand                                                                     |

|                       |          |                                                                                                             |
|-----------------------|----------|-------------------------------------------------------------------------------------------------------------|
| S3                    | CP001960 | Subspecies jejuni, poultry isolate, originally cultured from the feces of a chicken                         |
| PT14                  | CP003871 | Subspecies jejuni, used to isolate and propagate bacteriophages from environmental samples                  |
| NCTC<br>11168-BN148   | HE978252 | Subspecies jejuni, isolated in 1979 from the collection of the Centers for Disease Control and Prevention   |
| 32488                 | CP006006 | Isolated from human sample in US                                                                            |
| 00-2538               | CP006707 | Subspecies jejuni, isolated from stool sample in Canada                                                     |
| 00-2544               | CP006709 | Subspecies jejuni, isolated from stool sample in Canada                                                     |
| 00-2426               | CP006708 | Subspecies jejuni, isolated from stool sample in Canada                                                     |
| 00-2425               | CP006729 | Subspecies jejuni, isolated from stool sample in Canada                                                     |
| 4031                  | HG428754 | Isolate from contaminated tap water                                                                         |
| R14                   | CP005081 | Subspecies jejuni                                                                                           |
| MTVDSCj20             | CP008787 | Subspecies jejuni, isolated from the cecal contents of a farm-raised chicken                                |
| F38011                | CP006851 | Subspecies jejuni, isolated from human sample in Arizona                                                    |
| YH001                 | CP010058 | Subspecies jejuni, isolated from beef liver in Philadelphia, US                                             |
| NCTC<br>11168-K12E5   | CP006685 | Subspecies jejuni                                                                                           |
| NCTC<br>11168-Kf1     | CP006686 | Subspecies jejuni                                                                                           |
| NCTC<br>11168-mcK12E5 | CP006687 | Subspecies jejuni                                                                                           |
| NCTC<br>11168-mfK12E5 | CP006688 | Subspecies jejuni                                                                                           |
| NCTC<br>11168-GSv     | CP006689 | Subspecies jejuni                                                                                           |
| 00-1597               | CP010306 | Subspecies jejuni, isolated from a 34 year old patient with gastroenteritis stool sample in Alberta, Canada |
| 00-6200               | CP010307 | Subspecies jejuni, isolated from a 29 year old patient with gastroenteritis stool sample in Ontario, Canada |
| 01-1512               | CP010072 | Subspecies jejuni, isolated from a 1 year old infant New Brunswick, stool sample in Canada                  |
| 00-0949               | CP010301 | Subspecies jejuni, isolated from a 26 year old patient stool sample in Quebec, Canada                       |
| 35925B2               | CP010906 | Subspecies jejuni, clinical isolate from Chicago, US                                                        |
| 269.97                | CP000768 | Subspecies doylei, isolated from a blood sample of human bacteremia in South Africa                         |

*Chlamydia*

*trachomatis*

|                         |              |                                                                                                                                                                           |
|-------------------------|--------------|---------------------------------------------------------------------------------------------------------------------------------------------------------------------------|
| D/UW-3/CX               | AE001273     | Serovar D, isolated from the cervix of an asymptomatic female.                                                                                                            |
| L2/434/Bu               | AM88417      | Serovar L2, isolated from an inguinal bubo of a Lymphogranuloma<br>6 venereum case in California                                                                          |
| A/HAR-13                | CP000051     | Serovar A, oculotropic trachoma isolate                                                                                                                                   |
| B/TZ1A828/OT            | FM872307     | Serovar B, ocular isolate isolated in Tanzania                                                                                                                            |
| B/Jali20/OT             | FM872308     | Serovar B, ocular isolate isolated in the Gambia                                                                                                                          |
| L2b/UCH-1/proc<br>titis | AM88417<br>7 | Serovar L2b, isolated from a rectal swab of a 49-year-old men with<br>proctitis who have sex with men, and was HIV positive and Hepatitis C<br>negative in London in 2006 |
| D-EC                    | CP002052     | Serovar D, a laboratory reference strain                                                                                                                                  |
| E/150                   | CP001886     | Serovar E, a clinical isolate from rectum                                                                                                                                 |
| G/9768                  | CP001887     | Serovar G, a clinical isolate from rectum                                                                                                                                 |
| G/11222                 | CP001888     | Serovar G, a clinical isolate from cervix                                                                                                                                 |
| G/11074                 | CP001889     | Serovar G, a clinical isolate from rectum                                                                                                                                 |
| E/11023                 | CP001890     | Serovar E, a clinical isolate from cervix                                                                                                                                 |
| G/9301                  | CP001930     | Serovar G, a clinical isolate from urethra                                                                                                                                |
| D-LC                    | CP002054     | Serovar D, a clinical isolate                                                                                                                                             |
| Sweden2                 | FN652779     | Serovar E, isolated in McCoy cells in October 2006 from a urethral<br>sample from a Swedish man, suffering from symptomatic chlamydial<br>urethritis                      |
| Lc2                     | CP002024     | Serovar L2, isolated from a men with severe hemorrhagic proctitis who<br>have sex with men                                                                                |
| A2497                   | CP002401     | Serovar A, isolated from a 2.5-year-old with intense active trachoma;<br>Rombo District, Kilimanjaro Region, Tanzania; 2001                                               |
| A2497 serovarA          | FM872306     | Serovar A, a plasmid-deficient strain made from a 2.5-year-old with<br>intense active trachoma in Tanzania                                                                |
| E/SW3                   | HE601801     | Serovar E, urogenital isolates from Malmö, Southern Sweden, in 2002                                                                                                       |
| F/SW4                   | HE601804     | Serovar F, urogenital isolates from Malmö, Southern Sweden, in 2002                                                                                                       |
| F/SW5                   | HE601805     | Serovar F, urogenital isolates from Malmö, Southern Sweden, in 2002                                                                                                       |
| A/363                   | HE601796     | Serovar A, ocular isolate from Kahe Mpya, Rombo district, Tanzania                                                                                                        |
| A/7249                  | HE601797     | Serovar A, ocular isolate from Kahe Mpya, Rombo district, Tanzania                                                                                                        |
| E/Bour                  | HE601870     | Serovar E, ocular isolate from California, USA                                                                                                                            |
| Ia/SotonIa1             | HE601808     | Serovar Ia, endocervix isolate from Southampton, UK                                                                                                                       |
| Ia/SotonIa3             | HE601809     | Serovar Ia, endocervix isolate from Southampton, UK                                                                                                                       |
| L1/440/LN               | HE601950     | Serovar L1, lymph node isolate from California, USA                                                                                                                       |
| L1/115                  | HE601952     | Serovar L1, LGV patient isolate from Ciskei, South Africa                                                                                                                 |

|              |          |                                                                                             |                       |
|--------------|----------|---------------------------------------------------------------------------------------------|-----------------------|
| L1/224       | HE601953 | Serovar L1, LGV patient isolate from Transkei, South Africa                                 |                       |
| L2/25667R    | HE601954 | Serovar L2, Rectal biopsy isolate from USA                                                  |                       |
| L2b/8200/07  | HE601795 | Serovar L2b, rectum isolate from Sweden                                                     |                       |
| L2b/UCH-2    | HE601956 | Serovar L2b, rectum isolate from London, UK                                                 |                       |
| L2b/795      | HE601949 | Serovar L2b, rectum isolate from Bordeaux, France                                           |                       |
| L3/404/LN    | HE601955 | Serovar L3, lymph node isolate from California, USA                                         |                       |
| L2/434/Bu(i) | CP003963 | Serovar L2, isolated from an inguinal bubo of a Lymphogranuloma venereum case in California |                       |
| L2/434/Bu(f) | CP003965 | Serovar L2, isolated from an inguinal bubo of a Lymphogranuloma venereum case in California |                       |
| C/TW-3       | CP006945 | Serovar C, isolated in Taiwan in 1959 from the human conjunctiva                            |                       |
| F/1-93       | CP006671 | Serovar F, isolated in Washington, USA from human endo-cervical swab                        |                       |
| F/6-94       | CP006673 | Serovar F, isolated in Washington, USA from human endo-cervical swab                        |                       |
| F/11-96      | CP006674 | Serovar F, isolated in Washington, USA from human endo-cervical swab                        |                       |
| D/13-96      | CP006676 | Serovar D, isolated in Washington, USA from human endo-cervical swab                        |                       |
| J/31-98      | CP006680 | Serovar J, isolated in Washington, USA from human endo-cervical swab                        |                       |
| L2b/CS19/08  | CP009923 | Serovar L2b, isolated in Lisbon, Portugal from human LGV proctitis                          |                       |
| L2b/CS784/08 | CP009925 | Serovar L2b, isolated in Lisbon, Portugal from human LGV proctitis                          |                       |
| A/5291       | HE601810 | Serovar A, ocular isolate from Tanzania                                                     |                       |
| D/SotonD1    | HE601798 | Serovar D, endocervix isolate from Southampton, UK                                          |                       |
| D/SotonD5    | HE601799 | Serovar D, endocervix isolate from Southampton, UK                                          |                       |
| D/SotonD6    | HE601800 | Serovar D, endocervix isolate from Southampton, UK                                          |                       |
| E/SotonE4    | HE601802 | Serovar E, endocervix isolate from Southampton, UK                                          |                       |
| E/SotonE8    | HE601803 | Serovar E, endocervix isolate from Southampton, UK                                          |                       |
| F/SotonF3    | HE601806 | Serovar F, endocervix isolate from Southampton, UK                                          |                       |
| G/SotonG1    | HE601807 | Serovar G, endocervix isolate from Southampton, UK                                          |                       |
| K/SotonK1    | HE601794 | Serovar K, endocervix isolate from Southampton, UK                                          |                       |
| L2b/LST      | HE601958 | Serovar L2b, rectum isolate from Tourcoing, France                                          |                       |
| L2b/CV204    | HE601960 | Serovar L2b, rectum isolate from Paris, France                                              |                       |
| L2b/Ams1     | HE601959 | Serovar L2b, penile                                                                         | ulcer isolate from Ne |
| L2b/Ams2     | HE601961 | Serovar L2b, anus isolate from Netherlands                                                  |                       |
| L2b/Ams3     | HE601962 | Serovar L2b, anus isolate from Netherlands                                                  |                       |
| L2b/Ams4     | HE601964 | Serovar L2b, anus isolate from Netherlands                                                  |                       |

|                         |          |                                                                                                                                         |
|-------------------------|----------|-----------------------------------------------------------------------------------------------------------------------------------------|
| L2b/Ams5                | HE601965 | Serovar L2b, anus isolate from Netherlands                                                                                              |
| L2b/Canada1             | HE601963 | Serovar L2b, rectum isolate from Vancouver, Canada                                                                                      |
| L2b/Canada2             | HE601957 | Serovar L2b, rectum isolate from Vancouver, Canada                                                                                      |
| IU888                   | HF562300 | Serovar I, isolate from a 19-year-old woman 10 months after treatment with tetracycline and erythromycin for acute salpingitis          |
| IU824                   | HF562298 | Serovar I, isolate from the endometrium of a 27- year-old woman 5 months after tetracycline and 11 months after cephalosporin treatment |
| F/2-93                  | CP006672 | Serovar F, endo-cervical swab from Washington, USA                                                                                      |
| E/12-94                 | CP006675 | Serovar E, endo-cervical swab from Washington, USA                                                                                      |
| D/14-96                 | CP006677 | Serovar D, endo-cervical swab from Washington, USA                                                                                      |
| Ia20-97                 | CP006678 | Serovar Ia, endo-cervical swab from Washington, USA                                                                                     |
| J27-97                  | CP006679 | Serovar J, endo-cervical swab from Washington, USA                                                                                      |
| E/C599                  | HE605379 | Serovar E, isolate from a 26-year-old asymptomatic male                                                                                 |
| F/SWFPminus             | HE605380 | Serovar F, cervical isolate from Malmo, Sweden, in 1995                                                                                 |
| <i>Escherichia coli</i> |          |                                                                                                                                         |
| 042                     | FN554766 | EAEC, used for comparative analysis                                                                                                     |
| 536                     | CP000247 | UPEC, O6:K15:H31, isolated from a patient with acute pyelonephritis                                                                     |
| 55989                   | CU928145 | EAEC, clinical enteroaggregative isolate                                                                                                |
| ABU 83972               | CP001671 | causes an asymptomatic bacteriuria                                                                                                      |
| APEC O1                 | CP000468 | APEC, O1:K1:H7, avian pathogenic strain and causes respiratory, blood, and enteric infections primarily in poultry                      |
| ATCC 8739               | CP000946 | K-12 derivative, lacking the major porin OmpC                                                                                           |
| REL606                  | CP000819 | Commensal, strain B, used in long term evolution experiments to study rates of mutation and adaption                                    |
| BL21(DE3)               | CP001509 | Commensal, strain B, a derivative of E. coli strain B                                                                                   |
| BL21(DE3)               | AM94698  | Commensal, strain B, derived from strain B                                                                                              |
| 1                       |          |                                                                                                                                         |
| BL21-Gold(DE3 )pLysS AG | CP001665 | Commensal, strain B, a derivative of E. coli strain B                                                                                   |
| BW2952                  | CP001396 | K-12 derivative, used for comparative analysis                                                                                          |
| CFT073                  | AE014075 | UPEC, O6:K2:H1                                                                                                                          |
| DH1                     | CP001637 | K12 derivative, a common laboratory strain                                                                                              |
| E24377A                 | CP000800 | EPEC, O139:H28                                                                                                                          |
| HS                      | CP000802 | Commensal, O9, a human commensal                                                                                                        |
| IAI1                    | CU928160 | Commensal, O8, a serogroup O8 strain                                                                                                    |
| IAI39                   | CU928164 | UPEC, O7:K1, a Serovar O7:K1 strain from a urinary tract infection                                                                      |
| IHE3034                 | CP001969 | ExPEC, O18:K1:H7, a neonatal meningitis-associated strain isolated in Finland in 1976                                                   |

|                      |                                                                                                                                                                                                                                                       |
|----------------------|-------------------------------------------------------------------------------------------------------------------------------------------------------------------------------------------------------------------------------------------------------|
| 12009                | AP010958 EHEC, O103:H2                                                                                                                                                                                                                                |
| 11128                | AP010960 EHEC, O111:H-                                                                                                                                                                                                                                |
| E2348/69             | FM180568 EPEC, O127:H6                                                                                                                                                                                                                                |
| EC4115               | CP001164 EHEC, O157:H7, used for comparative analysis                                                                                                                                                                                                 |
| Sakai                | BA000007 EHEC, O157:H7, isolated in a 1997 outbreak in Sakai, Japan                                                                                                                                                                                   |
| TW14359              | CP001368 EHEC, O157:H7, isolated from spinach during the E. coli outbreak in 2006                                                                                                                                                                     |
| 11368                | AP010953 EHEC, O26:H11, a human enterohemorrhagic E. coli which attaches to and effaces cells in the large intestine                                                                                                                                  |
| CB9615               | CP001846 O55:H7, isolated from an infant with diarrhea in Germany in 2003                                                                                                                                                                             |
| S88                  | CU928161 ExPEC, O45:K1:H7, a Serovar O45:K1 strain isolated from a case of neonatal meningitis                                                                                                                                                        |
| SE11                 | AP009240 Commensal, O152:H28, for comparative genome analysis                                                                                                                                                                                         |
| SE15                 | AP009378 Commensal, O150:H5, for comparative genome analysis                                                                                                                                                                                          |
| SMS-3-5              | CP000970 Environmental isolate, isolated from a toxic-metal contaminated site, Shipyard Creek, Charleston, South Carolina, highly resistant to a number of antibiotics                                                                                |
| UM146                | CP002167 -                                                                                                                                                                                                                                            |
| UMN026               | CU928163 UPEC, O7:K1, a Serovar O7:K1 clinical isolate                                                                                                                                                                                                |
| UTI89                | CP000243 UPEC, isolated from a woman with uncomplicated cystitis                                                                                                                                                                                      |
| K-12 substrain W3110 | AP009048 Commensal, K-12, closely related to MG1655 and is descended from K-12                                                                                                                                                                        |
| NRG 857C             | CP001855 AIEC, O83:H1, clinical isolate from the ileum of a Crohn's Disease patient                                                                                                                                                                   |
| 2011C-3493           | CP003289 EAEC, O104:H4, isolated from US citizen afflicted with hemolytic uremic syndrome after travel to Germany during the 2011 <i>E. coli</i> outbreak                                                                                             |
| KO11                 | CP002516 Constructed for production of ethanol from hexose and pentose sugars in hemicellulose hydrolysates by inserting the <i>Zymomonas mobilis</i> genes encoding <i>pdh</i> and <i>adhB</i> during fermentation                                   |
| W                    | CP002185 Isolated from soil of a cemetery near Rutgers University in 1943, show sensitivity to broad range of antibiotics especially streptomycin                                                                                                     |
| ETEC H10407          | FN649414 ETEC, prototypical strain of <i>E. coli</i> , which reproducibly elicits diarrhea in human volunteer studies. Isolated from an adult with cholera-like symptoms in the course of an epidemiologic study in Dacca, Bangladesh, prior to 1973. |
| UMNK88               | CP002729 ETEC, isolated in 2007 from a farm in Minnesota                                                                                                                                                                                              |
| CE10                 | CP003034 NMEC, O7:K1, isolated from the CSF of a neonate with meningitis,                                                                                                                                                                             |



representative of group 2 isolates from CSF, carry a complete gene set encoding the type III secretion system, which involved in the invasion and intracellular survival of the bacterium in human brain microvascular endothelial cells

|                |          |                                                                                                                                                                                                   |
|----------------|----------|---------------------------------------------------------------------------------------------------------------------------------------------------------------------------------------------------|
| 'clone D i2'   | CP002211 | <i>E.coli</i> that causes urinary tract infection isolated from a women in 2005                                                                                                                   |
| 'clone D i14'  | CP002212 | <i>E.coli</i> that causes urinary tract infection isolated from a dog                                                                                                                             |
| RM12579        | CP003109 | EPEC, multidrug-resistant, isolated in December 1974 from the urine of a child less than 5 years old by the California Department of Public Health                                                |
| P12b           | CP002291 | O15:H17, non-pathogenic <i>E. coli</i> reference strains                                                                                                                                          |
| KO11FL         | CP002970 | New version of <i>E.coli</i> KO11 (ATCC 55124) engineered to produce ethanol by chromosomal insertion of the <i>Zymomonas mobilis pdc</i> and <i>adhB</i> genes into <i>E. coli</i> W (ATCC 9637) |
| W              | CP002967 | Isolated from soil of a cemetery near Rutgers University in 1943, show sensitivity to broad range of antibiotics especially streptomycin                                                          |
| Xuzhou21       | CP001925 | EHEC, isolated from an hemolytic uremic syndrome patient from the 1999 Xuzhou outbreak                                                                                                            |
| DH1 ME8569     | AP012030 | A commonly used laboratory strain as model organism strain derived from strain DH1 from Japan                                                                                                     |
| LF82           | CU651637 | AIEC, isolated from a patient with Crohn's disease                                                                                                                                                |
| ST131 strain   | HG941718 | O25b:H4, a leading multi-drug resistant pathogen causing urinary tract and bloodstream infections in hospitals and the community                                                                  |
| EC958          |          |                                                                                                                                                                                                   |
| 2009EL-2050    | CP003297 | EAEC, O104:H4, isolated from a human patient during 2009 bloody diarrhea outbreak in the Republic of Georgia                                                                                      |
| 2009EL-2071    | CP003301 | EAEC, O104:H4, isolated from a human patient during 2009 bloody diarrhea outbreak in the Republic of Georgia                                                                                      |
| APEC O78       | CP004009 | APEC, isolated from the lung of a turkey clinically diagnosed with colibacillosis                                                                                                                 |
| K-12 substrain | AP012306 | Non-pathogenic laboratory strain                                                                                                                                                                  |
| MDS42          |          |                                                                                                                                                                                                   |
| LY180          | CP006584 | Laboratory strain engineered to ferment sugars (glucose and xylose) into ethanol, derived from the widely used KO11 strain                                                                        |
| C321.deltaA    | CP006698 | First Genomically Recoded Organism                                                                                                                                                                |
| JJ1886         | CP006784 | UPEC, multidrug-resistant. Associated with recurrent urinary tract infections, pyelonephritis, and sepsis. Obtained in 2007 in the United States from a patient with fatal urosepsis.             |
| K-12 substrain | HG738867 | Laboratory strain derived from <i>E. coli</i> K12 strains MO and Hfr 3000                                                                                                                         |
| MC4100         | U169     |                                                                                                                                                                                                   |

|                       |          |                                                                                                                                                                             |
|-----------------------|----------|-----------------------------------------------------------------------------------------------------------------------------------------------------------------------------|
| RM13514               | CP006027 | STEC, O145:H28, clinical isolate and linked to the 2010 multi-state outbreak of <i>E. coli</i> O145 infection associated with consumption of shredded romaine lettuce in US |
| RM13516               | CP006262 | STEC, O145:H28, isolated from a patient in Belgium during a 2007 outbreak of infection associated with consumption of ice cream produced in a farm                          |
| ST540                 | CP007265 | nitrofurantoin-sensitive <i>E. coli</i> from stool samples of Belgian outpatients with urinary tract infection                                                              |
| ST540                 | CP007390 | nitrofurantoin-sensitive <i>E. coli</i> from stool samples of Belgian outpatients with urinary tract infection                                                              |
| ST540                 | CP007391 | nitrofurantoin-sensitive <i>E. coli</i> from stool samples of Belgian outpatients with urinary tract infection                                                              |
| ST2747                | CP007392 | nitrofurantoin-sensitive <i>E. coli</i> from stool samples of Belgian outpatients with urinary tract infection                                                              |
| ST2747                | CP007393 | nitrofurantoin-sensitive <i>E. coli</i> from stool samples of Belgian outpatients with urinary tract infection                                                              |
| ST2747                | CP007394 | nitrofurantoin-sensitive <i>E. coli</i> from stool samples of Belgian outpatients with urinary tract infection                                                              |
| RM12761               | CP007133 | O145:H28. Non-O157 STEC <i>E. coli</i> isolated from ice cream during a 2007 ice cream-associated outbreak in Belgium                                                       |
| RM12581               | CP007136 | STEC, O145:H28. Non-O157 <i>E. coli</i> isolated from bagged romaine lettuce during a 2010 U.S. lettuce-associated outbreak                                                 |
| Nissle 1917           | CP007799 | Probiotic <i>E. coli</i> isolated in 1917 based on its potential to protect from presumably infectious gastroenteritis                                                      |
| KLY                   | CP008801 | -                                                                                                                                                                           |
| SS17                  | CP008805 | EHEC, O157:H7. Obtained from the recto-anal junction of a cow, a super-shedder isolate                                                                                      |
| EDL933                | CP008957 | EHEC, O157:H7. Isolated from Michigan ground beef linked to the outbreak in 1982 involving contaminated hamburgers                                                          |
| ATCC 25922            | CP009072 | Isolated from a clinical sample in Seattle, Washington in 1946, and is often used in quality control testing                                                                |
| BW25113               | CP009273 | Common laboratory strain created in the laboratory of Barry L. Wanner                                                                                                       |
| ER2796                | CP009644 | Derived from JC1552, a DNA Methyltransferase-Deficient Laboratory K-12 derivative                                                                                           |
| K-12 strain<br>ER3413 | CP009789 | Sequenced by the Blattner laboratory because it approximates wild-type <i>E. coli</i> and has been maintained as a laboratory strain with minimal genetic manipulation      |
| RM9387                | CP009104 | STEC, O104:H7, isolated from cattle feces                                                                                                                                   |

|                          |          |                                                                                                                                     |
|--------------------------|----------|-------------------------------------------------------------------------------------------------------------------------------------|
| 94-3024                  | CP009106 | STEC, O104:H21, caused an outbreak of hemorrhagic colitis in Montana in 1994 linked to contaminated milk                            |
| K-12 substrain<br>MG1655 | CP009685 | Commensal, K-12, a non-pathogenic strain MG1655 approximates wild-type <i>E. coli</i>                                               |
| SS52                     | CP010304 | STEC, O157:H7, obtained from the recto-anal junction of a cow at Midwestern United States, a super-shedder isolate                  |
| APEC IMT5155             | CP005930 | APEC, O2:K1:H5, isolated from the internal organs of a laying hen with clinical symptoms of septicemia.                             |
| 6409                     | CP010371 | -                                                                                                                                   |
| 789                      | CP010315 | APEC, O78, isolated from the bone marrow of a chicken with acute colisepticaemia                                                    |
| Santai                   | CP007592 | EHEC, O157:H16, special pathogenic isolation in clinical healthy adult laying duck                                                  |
| 1303                     | CP009166 | O70:H32, isolated from udder secretions of a cow with clinical mastitis                                                             |
| C41(DE3)                 | CP010585 | “Walker strains” used in membrane protein overexpression                                                                            |
| ECC-1470                 | CP010344 | Ont:Hnt. isolated from a persistent infection cow                                                                                   |
| BL21 (TaKaRa)            | CP010816 | Common laboratory strains for recombinant protein production                                                                        |
| MNCRE44                  | CP010876 | ExPEC, ST131, Isolated in 2012 from the sputum sample from a patient with multiple comorbidities in Minnesota                       |
| HUSEC2011                | HF572917 | EHEC, Isolated from patients with hemolytic uremic syndrome                                                                         |
| VR50                     | CP011134 | Asymptomatic bacteria isolate associated with urinary tract infection                                                               |
| CI5                      | CP011018 | UPEC, clinical pyelonephritis isolate, used as <i>in vitro</i> cell culture models and <i>in vivo</i> murine infection models       |
| C227-11                  | CP011331 | EAEC, O104:H4. Isolated on 24 May 2011 from a German patient at Hvidovre University Hospital in Denmark during the O104:H4 outbreak |
| SEC470                   | CP007594 | ETEC, O4, isolated from a 39-day-old piglet with diarrhea at Jiangxi Province, China                                                |
| SQ37                     | CP011320 | A ribosomal deletion construct of <i>E. coli</i>                                                                                    |
| SQ88                     | CP011321 | A chromosome of the five rRNA operon knockout <i>E. coli</i> strain                                                                 |
| SQ110                    | CP011322 | A ribosomal deletion construct of <i>E. coli</i> MG1655                                                                             |
| SQ171                    | CP011323 | A ribosomal deletion construct of <i>E. coli</i>                                                                                    |
| SQ2203                   | CP011324 | A ribosomal deletion construct of <i>E. coli</i>                                                                                    |
| CFSAN029787              | CP011416 | Isolate of human stool sample from Milan                                                                                            |
| PMV-1                    | HG428755 | ExPEC, used as a model for peritonitis in mice and ExPEC infections                                                                 |
| GM4792 Lac+              | CP011342 | Common laboratory <i>E. coli</i> strain                                                                                             |
| PCN033                   | CP006632 | ExPEC, isolated from brain of swine with meningitis                                                                                 |
| PCN061                   | CP006636 | ExPEC, isolated from extraintestinal site of diseased pig                                                                           |
| ACN001                   | CP007442 | APEC, causes zoonotic diseases.                                                                                                     |

|                     |          |                                                                                                                                                       |
|---------------------|----------|-------------------------------------------------------------------------------------------------------------------------------------------------------|
| NCM3722             | CP011495 | A prototrophic K-12 strain with robust physiologic phenotypes                                                                                         |
| C43(DE3)            | CP011938 | “Walker strains” used in membrane protein overexpression                                                                                              |
| DH1Ec095            | CP012125 | K12 derivative, a common laboratory strain                                                                                                            |
| DH1Ec104            | CP012126 | K12 derivative, a common laboratory strain                                                                                                            |
| DH1Ec169            | CP012127 | K12 derivative, a common laboratory strain                                                                                                            |
| <i>Helicobacter</i> |          |                                                                                                                                                       |
| <i>pylori</i>       |          |                                                                                                                                                       |
| 26695               | AE000511 | Isolated from a patient in the United Kingdom who had gastritis before 1987                                                                           |
| J99                 | AE001439 | Isolated in 1994 in the USA from a patient with duodenal ulcer                                                                                        |
| 51                  | CP000012 | Isolated from a duodenal ulcer patient who had undergone a gastrointestinal examination in a hospital in South Korea                                  |
| HPAG1               | CP000241 | Isolated from a Swedish patient with chronic atrophic gastritis, the precursor to gastric adenocarcinoma                                              |
| Shi470              | CP001072 | Clinical isolate from gastric antrum from Amerindian resident of remote Amazonian village of Shimaa, Peru                                             |
| G27                 | CP001173 | Isolated from an endoscopy patient in Italy                                                                                                           |
| P12                 | CP001217 | Isolated from a duodenal ulcer patient in Germany in 1992                                                                                             |
| 52                  | CP001680 | Strain from Korea used for comparative study                                                                                                          |
| B38                 | FM991728 | Isolated from a 62-year-old man suffering from MALT lymphoma in France                                                                                |
| v225d               | CP001582 | Isolated from a gastric antral biopsy specimen from a Piaroa Amerindian who underwent a gastroscopy and was found to have acute superficial gastritis |
| 908                 | CP002184 | Isolated from an African patient living in France, who suffered from duodenal ulcer disease                                                           |
| SJM180              | CP002073 | Isolated from an Amerindian resident of San Juan Miraflores shantytown in Lima Peru with gastritis                                                    |
| PeCan4              | CP002074 | Isolated from a Peruvian gastric cancer patient                                                                                                       |
| Cuz20               | CP002076 | isolated from an Amerindian resident of the remote Amerindian village from Monte Carmelo near Cuzco, Peru                                             |
| Sat464              | CP002071 | Isolated from Amerindian resident from Satipo region, Peru                                                                                            |
| 35A                 | CP002096 | Isolated from human stomach, reference genome for Human Microbiome Project                                                                            |
| India 7             | CP002331 | Clinical isolate                                                                                                                                      |
| Gambia94/24         | CP002332 | Clinical isolate                                                                                                                                      |
| Lithuania75         | CP002334 | Clinical isolate                                                                                                                                      |
| 2017                | CP002571 | Isolated on 2003 from antrum of an African patient who suffered from                                                                                  |

|            |          |                                                                                                                     |
|------------|----------|---------------------------------------------------------------------------------------------------------------------|
|            |          | recrudescence duodenal ulcer disease in France                                                                      |
| 2018       | CP002572 | Isolated on 2003 from corpus of an African patient who suffered from recrudescence duodenal ulcer disease in France |
| B8         | FN598874 | Isolated from a human gastric ulcer patient, was adapted to Mongolian gerbil                                        |
| 83         | CP002605 | Isolated from human stomach, reference genome for Human Microbiome Project                                          |
| Puno120    | CP002980 | Clinical isolate from gastric antrum from Amerindian resident of Puno region in Peru                                |
| Puno135    | CP002982 | Clinical isolate from gastric antrum from Amerindian resident of Puno region in Peru                                |
| SNT49      | CP002983 | Isolate from Santal tribe in India                                                                                  |
| ELS37      | CP002953 | Isolate from gastric cancer patient from El Salvador rural area                                                     |
| HUP-B14    | CP003486 | Clinical isolate from resident of Spain                                                                             |
| XZ274      | CP003419 | Isolated from the stomach of a female Tibetan patient with gastric cancer in China                                  |
| F16        | AP011940 | Isolated from patients with gastritis in Fukui, Japan                                                               |
| F30        | AP011941 | Isolated from patients with duodenal ulcer in Fukui, Japan                                                          |
| F32        | AP011943 | Isolated from patients with intestinal type gastric cancer in Fukui, Japan                                          |
| F57        | AP011945 | Isolated from patients with diffuse type gastric cancer in Fukui, Japan                                             |
| Shi417     | CP003472 | Isolated from gastric antrum of Amerindian volunteer from remote Shimaa village in Amazon region in Peru            |
| Shi169     | CP003473 | Isolated from gastric antrum of Amerindian volunteer from remote Shimaa village in Amazon region in Peru            |
| Shi112     | CP003474 | Isolated from gastric antrum of Amerindian volunteer from remote Shimaa village in Amazon region in Peru            |
| PeCan18    | CP003475 | Clinical isolate from gastric antrum from resident of Lima, Peru                                                    |
| 26695      | CP003904 | Isolated from a patient in the United Kingdom with gastritis                                                        |
| Rif1       | CP003905 | Rifampin-resistant strain selected from H. pylori 26695                                                             |
| Rif2       | CP003906 | Rifampin-resistant strain selected from H. pylori 26695                                                             |
| Aklavik117 | CP003483 | Clinical isolate from Amerindian resident in Aklavik, Canada                                                        |
| Aklavik86  | CP003476 | Clinical isolate from Amerindian resident in Aklavik, Canada                                                        |
| OK113      | AP012600 | Collected in Okinawa Prefectural Chubu Hospital, Uruma, Okinawa, Japan                                              |
| OK310      | AP012601 | Collected in Okinawa Prefectural Chubu Hospital, Uruma, Okinawa, Japan                                              |
| UM032      | CP005490 | Isolated from a patient presenting with peptic ulcer disease                                                        |
| UM299      | CP005491 | Isolated from a patient presenting with peptic ulcer disease                                                        |

|                              |          |                                                                                                                                                      |
|------------------------------|----------|------------------------------------------------------------------------------------------------------------------------------------------------------|
| UM037                        | CP005492 | Isolated from a patient presenting with peptic ulcer disease                                                                                         |
| UM066                        | CP005493 | Isolated from a patient presenting with peptic ulcer disease                                                                                         |
| UM298                        | CP006610 | Isolated from a patient presenting with peptic ulcer disease                                                                                         |
| BM012A                       | CP006888 | Collected from antral gastric biopsy specimens from volunteer at Sir Charles Gairdner Hospital, Nedlands, Western Australia                          |
| AM012S                       | CP006889 | Collected from spouse of BM012A volunteer which was transmitted by the parental strain at Sir Charles Gairdner Hospital, Nedlands, Western Australia |
| oki102                       | CP006820 | Isolated from a patient in Okinawa, Japan who had gastric atrophy                                                                                    |
| oki112                       | CP006821 | Isolated from a patient in Okinawa, Japan who had gastric atrophy                                                                                    |
| oki128                       | CP006822 | Isolated from a patient in Okinawa, Japan who had gastric atrophy                                                                                    |
| oki154                       | CP006823 | Isolated from a patient in Okinawa, Japan who had duodenal ulcer                                                                                     |
| oki422                       | CP006824 | Isolated from a patient in Okinawa, Japan who had gastric atrophy                                                                                    |
| oki673                       | CP006825 | Isolated from a patient in Okinawa, Japan who had gastric ulcer                                                                                      |
| oki828                       | CP006826 | Isolated from a patient in Okinawa, Japan who had duodenal ulcer                                                                                     |
| oki898                       | CP006827 | Isolated from a patient in Okinawa, Japan who had duodenal ulcer                                                                                     |
| J166                         | CP007603 | Clinical isolate strain used for experimental infection of rhesus monkeys                                                                            |
| BM013A                       | CP007604 | Collected from antral gastric biopsy specimens from the study participant during gastroendoscopy                                                     |
| BM012B                       | CP007605 | Collected after 44 days of re-infection with BM012A to the participants                                                                              |
| BM013B                       | CP007606 | Collected after 20 days of re-infection with BM013A to the participant                                                                               |
| Hp238                        | CP010013 | Isolated from a Taiwanese patient with gastric MALT lymphoma                                                                                         |
| 26695-1                      | CP010435 | Sequenced as a wild type to compare with artificially induced drug resistant strains, Clarithromycin resistant strain                                |
| 26695-IMET                   | CP010436 | Metronidazole resistant strain                                                                                                                       |
| NY40                         | AP014523 | Phage belong to a previously undescribed viral family, has been isolate                                                                              |
| 26695-1                      | AP013354 | Sequenced as a wild type to compare with artificially induced drug resistant strains, Clarithromycin resistant strain                                |
| 26695-1CL                    | AP013356 | Sequenced as a wild type to compare with artificially induced drug resistant strains, Clarithromycin low resistant strain                            |
| 26695-1CH                    | AP013355 | Sequenced as a wild type to compare with artificially induced drug resistant strains, Clarithromycin high resistant strain                           |
| J99                          | CP011330 | isolated in the USA in 1994 from a patient with a duodenal ulcer                                                                                     |
| <i>Klebsiella pneumoniae</i> |          |                                                                                                                                                      |
| HS11286                      | CP003200 | Subspecies pneumoniae, isolated from a sputum specimen in 2011 at Huashan Hospital, Shanghai, China                                                  |
| NTUH-K2044                   | AP006725 | Serotype K1, Subspecies pneumoniae, isolated from a patient with liver                                                                               |

|                     |          |                                                                                                                                                                                                                                           |
|---------------------|----------|-------------------------------------------------------------------------------------------------------------------------------------------------------------------------------------------------------------------------------------------|
|                     |          | abscess and meningitis                                                                                                                                                                                                                    |
| MGH 78578           | CP000647 | Serotype K52, Subspecies pneumoniae, isolated from sputum of a 66 year-old man with pneumonia in 1994                                                                                                                                     |
| KCTC 2242           | CP002910 | A 2,3-Butanediol producing, industrially important bacterium                                                                                                                                                                              |
| KPNIH10             | CP007727 | Subspecies pneumoniae, isolated from rectal of 72 year old female patient no.10 related to the 2011 outbreak of carbapenem-resistant <i>Klebsiella pneumoniae</i> , patient died                                                          |
| KPNIH1              | CP008827 | Subspecies pneumoniae, isolated from groin of 43 year old female patient no.1 related to the 2011 outbreak of carbapenem-resistant <i>Klebsiella pneumoniae</i> , patient survive                                                         |
| 1084                | CP003785 | Serotype K1, Subspecies pneumoniae, isolated from a diabetic patient with a bacteremic liver abscess at a referral medical center in central Taiwan between 2002 and 2004. Hypermucoviscosity-negative K1 clinical strain.                |
| ATCC<br>BAA-2146    | CP006659 | First <i>Klebsiella</i> strain isolated from patient with urinary tract infection in the U.S. to be reported as a "superbug" which is resistance to all $\beta$ -lactam antibiotics except aztreonam                                      |
| JM45                | CP006656 | Isolated from the blood of a 72-year-old male with cerebral infarction after colon carcinoma resection hospitalized in the intensive care unit, the Second Affiliated Hospital of ZheJiang University School of Medicine on April 7, 2010 |
| CG43                | CP006648 | Serotype K2, isolated from liver abscess from Chang-Gung Memorial Hospital, virulent clinical isolate of K2 serotype which can synthesize aerobactin                                                                                      |
| Kp13                | CP003999 | Subspecies pneumoniae, isolated from blood culture of a patient admitted to the intensive care unit of a teaching hospital located in the city of Londrina, Southern Brazil                                                               |
| 30684/NJST258<br>_2 | CP006918 | Obtained in 2010 from patients with urinary tract infections at two separate healthcare institutions in New Jersey, multidrug-resistant.                                                                                                  |
| 30660/NJST258<br>_1 | CP006923 | Obtained in 2010 from patients with urinary tract infections at two separate healthcare institutions in New Jersey, multidrug-resistant.                                                                                                  |
| KPNIH27             | CP007731 | Subspecies pneumoniae, isolated from groin swabs of a patient of stem cell transplant in Jan 2012                                                                                                                                         |
| KPNIH24             | CP008797 | Subspecies pneumoniae, isolated from throat/groin swabs of a patient of immunodeficiency in Jul 2012                                                                                                                                      |
| KPR0928             | CP008831 | Subspecies pneumoniae, isolated from sputum of a patient of immunodeficiency in Oct 2012                                                                                                                                                  |
| PittNDM01           | CP006798 | Subspecies pneumoniae, isolated from urine of an inpatient at a hospital                                                                                                                                                                  |

in Pittsburgh, Pennsylvania in March, 2013

|                      |          |                                                                          |
|----------------------|----------|--------------------------------------------------------------------------|
| blaNDM-1             | CP009114 | Isolated from clinical urine culture                                     |
| ATCC 43816           | CP009208 | Subspecies pneumoniae, spontaneous rifampin-resistant isolate from       |
| KPPR1                |          | ATCC 43816                                                               |
| PMK1                 | CP008929 | Isolated from blood cultured from the first infected neonatal case       |
| KPNIH33              | CP009771 | Subspecies pneumoniae, isolated from urine of patient                    |
| KPNIH32              | CP009775 | Subspecies pneumoniae, isolated from perirectal swabs of a patient with  |
|                      |          | hematologic malignancy in Apr 2013                                       |
| xH209                | CP009461 | Isolated from the blood of a patient in Hangzhou, Zhejiang, China,       |
|                      |          | during tigecycline treatment                                             |
| KPNIH29              | CP009863 | Subspecies pneumoniae, isolated from perirectal swabs of a patient of    |
|                      |          | organ transplant in Nov 2013                                             |
| KPNIH30              | CP009872 | Subspecies pneumoniae, isolated from perirectal swabs of a patient of    |
|                      |          | hematologic malignancy in Nov 2013                                       |
| KPNIH31              | CP009876 | Subspecies pneumoniae, isolated from urine of a patient of hematologic   |
|                      |          | malignancy in Dec 2013                                                   |
| 32192                | CP010361 | Isolated from excreted bodily substance of a patient                     |
| HK787                | CP006738 | Serotype K2                                                              |
| 34618                | CP010392 | Isolated from bronchoalveolar lavage of a patient                        |
| 1158                 | CP006722 | Subspecies pneumoniae, serotype K2 strain from diabetic patient in       |
|                      |          | Taiwan                                                                   |
| Kp52.145             | FO834906 | Serotype K2, laboratory strain used to study Klebsiella pneumoniae       |
|                      |          | pathogenesis                                                             |
| 234-12               | CP011313 | Isolated from a blood culture in 2011 during an outbreak on a neonatal   |
|                      |          | intensive care unit in Germany                                           |
| SB3432               | FO203501 | Subspecies rhinoscleromatis, isolated in 2004 in the Avicenne hospital,  |
|                      |          | Bobigny, France from a biopsy of the left nasal cavity of an 11-year old |
|                      |          | patient diagnosed with rhinoscleroma                                     |
| CAV1392              | CP011578 | Isolated from sputum of patient                                          |
| CAV1344              | CP011624 | Isolated from urine of urinary tract infection patient at Virginia, USA  |
| CAV1596              | CP011647 | Isolated from perirectal from Virginia, USA                              |
| <i>Listeria</i>      |          |                                                                          |
| <i>monocytogenes</i> |          |                                                                          |
| 4b F2365             | AE017262 | Serotype 4b, isolated in 1985 in California, USA, during an outbreak of  |
|                      |          | listeriosis among patients with AIDS which was caused by cheese          |
|                      |          | product                                                                  |
| HCC23                | CP001175 | Serotype 4a, isolated from channel catfish                               |
| 08-5923              | CP001604 | Serotype 1/2a, isolated from a human blood specimen associated with      |



|                                     |                                  |                                                                                                                                                                                                                                                               |
|-------------------------------------|----------------------------------|---------------------------------------------------------------------------------------------------------------------------------------------------------------------------------------------------------------------------------------------------------------|
|                                     |                                  | the listeriosis outbreaks in Canada in 2008                                                                                                                                                                                                                   |
| Clip80459<br>serotype 4b<br>08-5578 | FM242711<br>CP001602             | Serotype 4b, isolated in a clinical outbreak of listeriosis in France affecting 42 persons<br>Serotype 1/2a, isolated from a human blood specimen associated with the listeriosis outbreaks in Canada in 2008                                                 |
| FSL R2-561<br>Finland 1998          | CP002003<br>CP002004             | Serotype 1/2c,<br>Serotype 3a, isolated from packaged dairy butter delivered to Tertiary Care Hospital by a Finnish dairy plant                                                                                                                               |
| J0161                               | CP002001                         | Serotype 1/2a, isolated from a case in a human listeriosis outbreak in 2000 linked to consumption of sliced turkey in the United States                                                                                                                       |
| 10403S                              | CP002002                         | serotype 1/2a, streptomycin resistant isolate of strain 10403 the parental strain 10403 was first isolated from a human skin lesion obtained from Montana State University                                                                                    |
| J1816                               | CP006046                         | Serotype 4b, ECII strain involved in the 2002 U.S. outbreak associated with turkey deli meat isolated from the environment                                                                                                                                    |
| J1-220                              | CP006047                         | Serotype 4b, ECIV strain involved in an outbreak associated with vegetables                                                                                                                                                                                   |
| L99                                 | FM211688                         | Serotype 4a, isolated from food by Kampelmacher in 1950s in the Netherlands                                                                                                                                                                                   |
| M7<br>07PF0776                      | CP002816<br>CP003414             | Serotype 4a, isolated from cow's milk in Zhejiang province, China<br>Serotype 4b, isolated from blood cultures from the patient by the Baystate Health Microbiology Laboratory                                                                                |
| 4b str. LL195                       | HF558398                         | Serotype 4b, isolated during the 1983–1987 listeriosis epidemic in Switzerland                                                                                                                                                                                |
| R2-502<br>C1-387<br>J2-064          | CP006594<br>CP006591<br>CP006592 | Serotype 1/2b, isolated from food in USA<br>Serotype 1/2a, isolated from turkey breast in 1999 at New York<br>Serotype 1/2b, carries one of the most common ribotypes found among food isolates, DUP-1052, and also is commonly associated with human disease |
| J2-031                              | CP006593                         | Serotype 1/2a, isolated from cow                                                                                                                                                                                                                              |
| J2-1091                             | CP006596                         | Serotype 1/2a, isolated from animal                                                                                                                                                                                                                           |
| N1-011A                             | CP006597                         | Serotype 1/2b, isolated from environmental sample, a non-outbreak sample                                                                                                                                                                                      |
| J1776                               | CP006598                         | Serotype 4b, ECII strain involved in the 2002 U.S. outbreak associated with turkey deli meat isolated from food                                                                                                                                               |
| J1817                               | CP006599                         | Serotype 4b, ECII strain involved in the 2002 U.S. outbreak associated with turkey deli meat isolated from the environment                                                                                                                                    |
| J1926                               | CP006600                         | Serotype 4b, ECII strain involved in the 2002 U.S. outbreak associated                                                                                                                                                                                        |

with turkey deli meat isolated from human sample

|                              |          |                                                                                                                                                                                         |
|------------------------------|----------|-----------------------------------------------------------------------------------------------------------------------------------------------------------------------------------------|
| WSLC1001                     | CP007160 | Serotype 1/2a, isolated from Germany                                                                                                                                                    |
| WSLC1042                     | CP007210 | Serotype 4b, associated with outbreak and isolated from Germany                                                                                                                         |
| 6179                         | HG813249 | Serotype 1a, isolate from farmhouse cheese                                                                                                                                              |
| EGD                          | HG421741 | Serotype 1/2a, isolated from guinea pigs in 1926                                                                                                                                        |
| NE dc2014                    | CP007492 | Isolated from disease outbreak due to cheese from USA                                                                                                                                   |
| R479a                        | HG813247 | Serotype 1/2a, isolated from smoked salmon from Denmark and persisted from November 1996 to January 1999                                                                                |
| CFSAN006122                  | CP007600 | Isolated from disease outbreak due to cheese from USA                                                                                                                                   |
| Lm60                         | CP009258 | Serotype 1/2a, isolated from blood of a sporadic case of human listeriosis that shows enhanced cold stress tolerance in Switzerland                                                     |
| NTSN                         | CP009897 | Serotype 4b, isolated from the brains of sheep in Jiangsu Province, China                                                                                                               |
| IZSAM_Lm_hs2<br>008          | CP010346 | Serotype 4b, isolated from cerebrospinal fluid of an immunocompetent adult male resident in Italy not belonging to any particular high-risk category who developed the disease and died |
| N2306                        | CP011004 | Serotype 4b, isolated from a Swiss listeriosis outbreak in 2014 due to the consumption of contaminated ready-to-eat salads                                                              |
| CFSAN008100                  | CP011398 | Isolated from green chili ingredient in USA                                                                                                                                             |
| CFSAN007956                  | CP011397 | -                                                                                                                                                                                       |
| La111                        | HE999704 | Serotype 1/2a, isolated from a package of cold-smoked salmon in 1996                                                                                                                    |
| N53-1                        | HE999705 | Serotype 1/2a, isolated from a Danish fish processing environment in 2002                                                                                                               |
| EGD-e                        | AL591824 | Serotype 1/2a, isolated from a rabbit tissue in Cambridge, England in 1924                                                                                                              |
| serotype 7 str.<br>SLCC2482  | FR720325 | Serotype 7, clinical isolates from human sample                                                                                                                                         |
| L2676                        | CP007685 | Serotype 1/2a, isolated from cantaloupe in US during 2011                                                                                                                               |
| L2624                        | CP007686 | Serotype 1/2b, isolated from cantaloupe in US during 2011                                                                                                                               |
| L2625                        | CP007687 | Serotype 1/2a, isolated from cantaloupe in US during 2011                                                                                                                               |
| L1846                        | CP007688 | Serotype 1/2b, isolated from sporadic clinical isolate                                                                                                                                  |
| L2074                        | CP007689 | Serotype 1/2a, isolated from a human clinical isolate                                                                                                                                   |
| <i>Staphylococcus aureus</i> |          |                                                                                                                                                                                         |
| 04-02981                     | CP001844 | MRSA                                                                                                                                                                                    |
| ED98                         | CP001781 | Avian pathogen, isolated from a broiler chicken in Northern Ireland                                                                                                                     |
| RF122                        | AJ938182 | Bovine pathogen, a common strain associated with mastitis in cattle                                                                                                                     |
| COL                          | CP000046 | MRSA, resistant to several other antibiotics including penicillin and                                                                                                                   |

tetracycline

|                    |          |                                                                                                                                                                                                   |
|--------------------|----------|---------------------------------------------------------------------------------------------------------------------------------------------------------------------------------------------------|
| ED133              | CP001996 | Ovine pathogen                                                                                                                                                                                    |
| JH1                | CP000736 | VISA, the chronologically earliest strain was vancomycin sensitive                                                                                                                                |
| JH9                | CP000703 | VISA, exhibited increased vancomycin resistance                                                                                                                                                   |
| JKD6159            | CP002114 | MRSA                                                                                                                                                                                              |
| MRSA252            | BX571856 | MRSA, a hospital-acquired strain isolated in the United Kingdom                                                                                                                                   |
| MSSA476            | BX571857 | MSSA, a hyper-virulent community acquired MSSA strain isolated in the United Kingdom                                                                                                              |
| MW2                | BA000033 | MRSA, a community-acquired MRSA strain                                                                                                                                                            |
| Mu3                | AP009324 | VISA, comparative genome analysis                                                                                                                                                                 |
| Mu50               | BA000017 | VISA, a MRSA strain with vancomycin resistance isolated in 1997                                                                                                                                   |
| N315               | BA000018 | MRSA, a MRSA strain isolated in 1982 from a pharyngeal smear of a Japanese patient                                                                                                                |
| NCTC 8325          | CP000253 | MSSA, the prototypical strain for most genetic research on <i>S. aureus</i>                                                                                                                       |
| ST398 S0385        | AM99099  | MRSA<br>2                                                                                                                                                                                         |
| TW20               | FN433596 | MRSA                                                                                                                                                                                              |
| USA300_FPR37<br>57 | CP000255 | MRSA, strong association with unusually invasive disease, including severe septicemia, necrotizing pneumonia and necrotizing fasciitis                                                            |
| USA300_TCH1<br>516 | CP000730 | MRSA, comparative analysis                                                                                                                                                                        |
| JKD6008            | CP002120 | MRSA, resistant to methicillin and has intermediate sensitivity to vancomycin                                                                                                                     |
| Newman             | AP009351 | MRSA, comparative genome analysis                                                                                                                                                                 |
| TCH60              | CP002110 | Reference genome for the Human Microbiome Project                                                                                                                                                 |
| 55/2053            | CP002388 | Comparative genome analysis                                                                                                                                                                       |
| T0131              | CP002643 | MRSA, isolated in 2006 from an 87-year-old patient in No.3 Central Hospital, Tianjin, China                                                                                                       |
| M013               | CP003166 | MRSA, pvl-positive ST59:SCCmec V Strain, isolated in 2002 from a wound specimen of a pediatric outpatient during part of the Taiwan Surveillance of Antimicrobial Resistance surveillance project |
| LGA251             | FR821779 | Isolated from a bulk milk sample from a farm in southwest England in May, 2007                                                                                                                    |
| 11819-97           | CP003194 | MRSA, Isolated from a skin infection in Denmark in 1997                                                                                                                                           |
| VC40               | CP003033 | VRSA                                                                                                                                                                                              |
| ECT-R 2            | FR714927 | Multiresistant-MRSA, Human patient isolate with an unusual pattern of resistance against antibiotics                                                                                              |
| HO 5096 0412       | HE681097 | EMRSA, isolated from a fatal neonatal infection in Suffolk, UK in                                                                                                                                 |

February 2005

|                |          |                                                                                                                                                                          |
|----------------|----------|--------------------------------------------------------------------------------------------------------------------------------------------------------------------------|
| 08BA02176      | CP003808 | MRSA, obtained in 2008 from a human postoperative surgical site infection                                                                                                |
| 16035          | HE579065 | MRSA, collected between 2001 and 2008 at the tertiary care hospital of Lausanne                                                                                          |
| 16125          | HE579067 | MRSA, collected between 2001 and 2008 at the tertiary care hospital of Lausanne                                                                                          |
| 18583          | HE579073 | MRSA, collected between 2001 and 2008 at the tertiary care hospital of Lausanne                                                                                          |
| CA-347         | CP006044 | MRSA, isolated from a bacteremia infection in 2005 in California                                                                                                         |
| Bmb9393        | CP005288 | MRSA, isolated in 1993 from a case of nosocomial bloodstream infection in Rio de Janeiro, Brazil                                                                         |
| 6850           | CP006706 | MSSA, derived from a patient with a complicated <i>S. aureus</i> bacteremia, associated with osteomyelitis and septic arthritis                                          |
| CN1            | CP003979 | MRSA, obtained from the pus of a necrotizing fasciitis infection in an 80-year old patient in the Seoul area of South Korea                                              |
| SA957          | CP003603 | MRSA, representative strains of Taiwan clone                                                                                                                             |
| SA40           | CP003604 | MRSA, representative strains of Asian-Pacific clone                                                                                                                      |
| Z172           | CP006838 | MRSA, isolated in 2010 from a blood specimen of an elderly intensive care unit patient during part of the Taiwan Surveillance of Antimicrobial Resistance project        |
| USA300-ISMM S1 | CP007176 | MRSA, isolated from liver transplant recipient that despite transmission from a deceased donor with MRSA endocarditis and bacteremia                                     |
| 502A           | CP007454 | Bacterial Interference Strain, isolated in 1963 from a nurse in a newborn nursery who was caring for a cluster of 40 neonates who also became colonized with this strain |
| NRS100         | CP007539 | MRSA, laboratory strain with tetracycline resistant                                                                                                                      |
| H-EMRSA-15     | CP007659 | MRSA, isolated from wound                                                                                                                                                |
| UA-S391_USA300 | CP007690 | A prolific biofilm formers isolated from abscess or wound                                                                                                                |
| XN108          | CP007447 | MRSA, isolated from a steam-burned patient with a wound infection                                                                                                        |
| SA268          | CP006630 | MRSA, isolated from both the blood and the sputum of a young patient with severe sepsis and acute respiratory failure in March of 2012                                   |
| 2395 USA500    | CP007499 | MRSA, isolated from a wound infection which shown hypervirulent in a murine model of systemic infection and highly cytotoxic towards primary human neutrophils           |
| ATCC 25923     | CP009361 | a standard laboratory testing control strain for susceptibility testing to antibiotics and as a quality control strain for commercial products                           |

|                             |          |                                                                                                                                                                                            |
|-----------------------------|----------|--------------------------------------------------------------------------------------------------------------------------------------------------------------------------------------------|
| Gv69                        | CP009681 | Isolated from a hospitalized patient presented with wound infection in Teresina, PI, Brazil in 1996                                                                                        |
| FORC_001                    | CP009554 | Isolated from one of the real sample which caused food-borne outbreaks in South Korea                                                                                                      |
| 29b_MRSA                    | CP010295 | MRSA, isolate was propagated in ATCC medium 18, tryptic soy agar, and has been utilized as a model <i>S. aureus</i> strain                                                                 |
| 31b_MRSA                    | CP010296 | MRSA, isolate was propagated in ATCC medium 18, tryptic soy agar, and has been utilized as a model <i>S. aureus</i> strain                                                                 |
| 33b                         | CP010297 | MRSA, isolate was propagated in ATCC medium 18, tryptic soy agar, and has been utilized as a model <i>S. aureus</i> strain                                                                 |
| 26b_MRSA                    | CP010298 | MRSA, isolate was propagated in ATCC medium 18, tryptic soy agar, and has been utilized as a model <i>S. aureus</i> strain                                                                 |
| 25b_MRSA                    | CP010299 | MRSA, isolate was propagated in ATCC medium 18, tryptic soy agar, and has been utilized as a model <i>S. aureus</i> strain                                                                 |
| 27b_MRSA                    | CP010300 | MRSA, isolate was propagated in ATCC medium 18, tryptic soy agar, and has been utilized as a model <i>S. aureus</i> strain                                                                 |
| ST772-MRSA-V strain DAR4145 | CP010526 | MRSA, blood sample isolation from Mumbai, India                                                                                                                                            |
| ILRI Eymole1/1              | LN626917 | Isolated from nasal swab of camel from Kenya                                                                                                                                               |
| 10388                       | HE579059 | MRSA, collected between 2001 and 2008 at the tertiary care hospital of Lausanne                                                                                                            |
| 10497                       | HE579061 | MRSA, collected between 2001 and 2008 at the tertiary care hospital of Lausanne                                                                                                            |
| 15532                       | HE579063 | MRSA, collected between 2001 and 2008 at the tertiary care hospital of Lausanne                                                                                                            |
| 18341                       | HE579069 | MRSA, collected between 2001 and 2008 at the tertiary care hospital of Lausanne                                                                                                            |
| 18412                       | HE579071 | MRSA, collected between 2001 and 2008 at the tertiary care hospital of Lausanne                                                                                                            |
| FCFHV36                     | CP011147 | MRSA, isolated from a vertebral biopsy sample from a patient diagnosed with community-acquired osteomyelitis and under medical care in the hospital in the state of Santa Catarina, Brazil |
| 71193                       | CP003045 | MSSA, isolated in 2004 from human                                                                                                                                                          |
| M1                          | HF937103 | MRSA, clinical isolate from outbreak in Copenhagen, Denmark, that started in 2003                                                                                                          |
| M121                        | CP007670 | MRSA, isolated from nasal swab from healthy volunteer at Columbia                                                                                                                          |
| CA15                        | CP007674 | Isolated from blood with bacteremia                                                                                                                                                        |

*Salmonella*

*enterica*

|             |          |                                                                                                                                                                                 |
|-------------|----------|---------------------------------------------------------------------------------------------------------------------------------------------------------------------------------|
| D23580      | FN424405 | serovar Typhimurium                                                                                                                                                             |
| SL483       | CP001138 | serovar Agona, causes gastroenteritis in humans and is also pathogenic to swine and other food animals                                                                          |
| SC-B67      | AE017220 | serovar Choleraesuis, an extremely invasive serovar that is increasingly becoming resistant to multiple antibiotics such as fluoroquinolones                                    |
| CT_02021853 | CP001144 | serovar Dublin, This is a bovine-adapted serovar that is genetically related to <i>S. Enteritidis</i> that lives in the bovine intestinal tract and can cause disease in humans |
| P125109     | AM93317  | serovar Enteritidis, a virulent phage type 4 strain<br>2                                                                                                                        |
| 287/91      | AM93317  | serovar Gallinarum, the causative agent of Fowl typhoid, a severe<br>3 systemic disease of poultry                                                                              |
| SL476       | CP001120 | serovar Heidelberg, a multidrug resistant strain                                                                                                                                |
| SL254       | CP001113 | serovar Newport, an multidrug resistant strain from one of two distinct lineages of the Newport serovar                                                                         |
| AKU_12601   | FM200053 | serovar Paratyphi A, a clinical isolate collected from a child with paratyphoid fever in Karachi, Pakistan, 2004                                                                |
| ATCC 9150   | CP000026 | serovar Paratyphi A, a narrow host range and causes a typhoid-like illness in humans                                                                                            |
| SPB7        | CP000886 | serovar Paratyphi B, susceptible to antibiotics, classified as serovar Paratyphi B                                                                                              |
| RKS4594     | CP000857 | serovar Paratyphi C, harbors a large pathogenicity island, SPI7, with genes coding for the virulence antigen                                                                    |
| CVM19633    | CP001127 | serovar Schwarzengrund, predominant cause of Salmonellosis in Southeast Asia                                                                                                    |
| CT18        | AL513382 | serovar Typhi, a multidrug resistant strain of <i>Salmonella typhi</i>                                                                                                          |
| Ty2         | AE014613 | serovar Typhi, no multidrug resistance plasmids and has been used for vaccine development                                                                                       |
| 14028S      | CP001363 | serovar Typhimurium, substrain of strain LT2                                                                                                                                    |
| LT2         | AE006468 | serovar Typhimurium, isolated in the 1940s by Lilleengen                                                                                                                        |
| SL1344      | FQ312003 | serovar Typhimurium                                                                                                                                                             |
| ST4/74      | CP002487 | serovar Typhimurium, isolated from a calf with salmonellosis in the United Kingdom                                                                                              |
| 507440-20   | CP007530 | serovar Montevideo, causes Pepper Salami Outbreak                                                                                                                               |
| UK-1        | CP002614 | serovar Typhimurium                                                                                                                                                             |
| RKS5078     | CP003047 | Serovar Gallinarum biovar Pullorum, chicken-adapted pullorum agent closely related to another chicken pathogen, <i>Salmonella enterica</i>                                      |

serovar Gallinarum

|              |          |                                                                                                                                     |
|--------------|----------|-------------------------------------------------------------------------------------------------------------------------------------|
| P-stx-12     | CP003278 | serovar Typhi, clinical isolate obtained from a typhoid carrier in India                                                            |
| 798          | CP003386 | serovar Typhimurium, causes persistent infections in pigs and can spread to other animals and cause food-borne disease in humans    |
| B182         | CP003416 | serovar Heidelberg, isolated from bovine feces in France                                                                            |
| CVM 21550    | CP010283 | serovar Newport, isolated from swine                                                                                                |
| CVM 22513    | CP010281 | serovar Newport, isolated from cattle                                                                                               |
| CVM 21538    | CP010282 | serovar Newport, isolated from chicken                                                                                              |
| CVM 22425    | CP010279 | serovar Newport, isolated from cattle                                                                                               |
| CVM N18486   | CP009561 | serovar Newport, isolated from ground turkey                                                                                        |
| CVM N1543    | CP010284 | serovar Newport, isolated from ground beef                                                                                          |
| CVM 22462    | CP010280 | serovar Newport, isolated from canine                                                                                               |
| 77-1427      | CP007598 | serovar Enteritidis, clinical isolate                                                                                               |
| T000240      | AP011957 | serovar Typhimurium, isolated from human gastroenteritis in Japan in 2000                                                           |
| CDC_2010K_09 | CP007528 | serovar Enteritidis, clinical isolate                                                                                               |
| 68           |          |                                                                                                                                     |
| 18569        | CP011394 | serovar Enteritidis, poultry isolate from Mexico                                                                                    |
| CFSAN001992  | CP004027 | serovar Javiana, common food-borne pathogen and is often associated with fresh-cut produce                                          |
| Ty21a        | CP002099 | serovar Typhi, an important vaccine for controlling typhoid fever and serves as an oral vector for delivering heterologous antigens |
| CFSAN002069  | CP005390 | serovar Heidelberg, isolated from an unopened chicken sample collected from the patient's home at Washington State                  |
| 41578        | CP004086 | serovar Heidelberg, clinical isolate                                                                                                |
| CFSAN002050  | CP006055 | serovar Cubana, isolated from fresh alfalfa sprouts in Arizona in 2012                                                              |
| CFSAN001921  | CP006048 | serovar Typhimurium, var. 5, isolated from chicken breast meat                                                                      |
| 08-1736      | CP006602 | serovar Typhimurium, isolated from pig samples in Spain in 1997                                                                     |
| CFSAN000189  | CP006053 | serovar Bareilly, isolated from raw frozen shrimp                                                                                   |
| USMARC-S312  | CP006631 | serovar Newport, isolated from cattle                                                                                               |
| 4.1          |          |                                                                                                                                     |
| S06004       | CP006575 | serovar Pullorum, a nalidixic acid-resistant clinical isolate obtained in 2006 from chickens in Jiangsu China                       |
| CDC1983-67   | CP003786 | serovar Gallinarum biovar Pullorum                                                                                                  |
| RM6836       | CP006717 | serovar Thompson, isolated from lettuce in 2002                                                                                     |
| 460004 2-1   | CP011259 | serovar Agona, isolated from unsweetened puffed-rice cereal in Minnesota in 2008                                                    |
| ATCC 8391    | CP011396 | serovar Thompson, isolated from fresh bagged lettuce                                                                                |

TXSC\_TXSC08- CP007505 serovar Tennessee, isolated from fishmeal at Texas in US  
19

ATCC CP007531 serovar Anatum, isolated from tomatoes in Pennsylvania  
BAA-1592

0014 CP007534 serovar Abony

CFSAN001080 CP007533 serovar Bredeney, isolated from Marjoram

ATCC 35640 CP007532 serovar Abaetetuba, isolated from Creek Water, Argentina, Zaiman

DT2 HG326213 serovar Typhimurium, isolated from *Columba livia*

DT104 HF937208 serovar Typhimurium, widely disseminated zoonotic pathogen with  
multidrug-resistant

24249 CP006876 serovar Agona, isolated from ready to eat meat from a factory at Ireland

CFSAN002064 CP005995 serovar Heidelberg, isolated from stool of outbreak case patient which  
had consume a specific brand of chicken

Durban CP007507 serovar Enteritidis, isolated from a patient with salmonellosis and  
typhoid fever

EC20121175 CP007269 serovar Enteritidis, isolated from chick paper at Manitoba, Canada

EC20121179 CP007272 serovar Enteritidis, isolated from quail at Quebec, Canada

SA20093266 CP007274 serovar Enteritidis, isolated from chicken feces at Ontario, Canada

EC20110223 CP007266 serovar Enteritidis, isolated from human sample during mung bean  
outbreak at Ontario, Canada

EC20120005 CP007267 serovar Enteritidis, isolated from broiler at Ontario, Canada

EC20110361 CP007263 serovar Enteritidis, isolated from sporadic human sample (2009) at  
Alberta, Canada

EC20110360 CP007258 serovar Enteritidis, isolated from sporadic human sample (2004) at  
Alberta, Canada

EC20110359 CP007259 serovar Enteritidis, isolated from sporadic human sample (2004) at  
Alberta, Canada

EC20110358 CP007260 serovar Enteritidis, isolated from sporadic human sample (2009) at  
Alberta, Canada

EC20110357 CP007261 serovar Enteritidis, isolated from sporadic human sample (2003) at  
Alberta, Canada

EC20110356 CP007262 serovar Enteritidis, isolated from human outbreak sample (2009) at  
Alberta, Canada

EC20090135 CP007320 serovar Enteritidis, isolated from chicken in Ontario, Canada

EC20090193 CP007321 serovar Enteritidis, isolated from chicken in Ontario, Canada

EC20090332 CP007322 serovar Enteritidis, isolated from chicken in Ontario, Canada

EC20120916 CP007332 serovar Enteritidis, isolated from chicken in Ontario, Canada

EC20100103 CP007420 serovar Enteritidis, isolated from chicken in Ontario, Canada



|               |          |                                                                                                                                                      |
|---------------|----------|------------------------------------------------------------------------------------------------------------------------------------------------------|
| EC20090884    | CP007421 | serovar Enteritidis, isolated from chicken in Ontario, Canada                                                                                        |
| EC20090531    | CP007422 | serovar Enteritidis, isolated from chicken in Ontario, Canada                                                                                        |
| EC20110354    | CP007175 | serovar Enteritidis, isolated from hospitalized patient sample during outbreak (2010) at Alberta, Canada                                             |
| EC20120008    | CP007245 | serovar Enteritidis, isolated from reptile in Ontario, Canada                                                                                        |
| EC20110221    | CP007247 | serovar Enteritidis, isolated from human sample during mung bean outbreak in Ontario, Canada                                                         |
| EC20090698    | CP007248 | serovar Enteritidis, isolated from abattoir Sporadic chicken sample in Alberta, Canada                                                               |
| EC20090641    | CP007249 | serovar Enteritidis, isolated from abattoir Sporadic chicken sample in Alberta, Canada                                                               |
| EC20110355    | CP007250 | serovar Enteritidis, isolated from food –breast outbreak sample in Alberta, Canada                                                                   |
| EC20110353    | CP007251 | serovar Enteritidis, isolated from food –pork dumpling outbreak sample at Alberta, Canada                                                            |
| EC20111175    | CP007252 | serovar Enteritidis, isolated from environmental- chicken fluff in Quebec, Canada                                                                    |
| EC20111174    | CP007253 | serovar Enteritidis, isolated from environmental- chicken fluff in Quebec, Canada                                                                    |
| EC20111095    | CP007254 | serovar Enteritidis, isolated from human outbreak sample in Quebec, Canada in 2011                                                                   |
| EC20120009    | CP007438 | serovar Enteritidis, isolated from rodent sample in Ontario, Canada                                                                                  |
| EC20120929    | CP007463 | serovar Enteritidis, isolated from chicken in Ontario, Canada                                                                                        |
| SA20084644    | CP007466 | serovar Enteritidis, isolated from avian in Ontario, Canada                                                                                          |
| 138736        | CP007581 | serovar Typhimurium, stool sample from patient with gastroenteritis in Israel                                                                        |
| VNP20009      | CP007804 | serovar Typhimurium, a derivative of 14028S and was selected after UV and chemical mutagenesis for tumor-colonizing and growth-inhibiting properties |
| C500          | CP007639 | serovar Choleraesuis, isolated from chicken intestinal in Yangzhou, China                                                                            |
| ATCC 13311    | CP009102 | serovar Typhimurium, genomic DNA isolated from <i>Salmonella enterica</i> subsp. Serovar Typhimurium strain NCTC 74                                  |
| OLF-SE7-10081 | CP009089 | serovar Enteritidis                                                                                                                                  |
| 9             |          |                                                                                                                                                      |
| OLF-SE8-10217 | CP009090 | serovar Enteritidis                                                                                                                                  |
| 10            |          |                                                                                                                                                      |
| OLF-SE9-10012 | CP009091 | serovar Enteritidis                                                                                                                                  |

OLF-SE10-1005 CP009092 serovar Enteritidis  
 2  
 OLF-SE11-1005 CP009093 serovar Enteritidis  
 8  
 OLF-SE3-98983 CP009085 serovar Enteritidis  
 -4  
 OLF-SE2-98984 CP009084 serovar Enteritidis  
 -6  
 OLF-SE4-0317- CP009086 serovar Enteritidis  
 8  
 OLF-SE5-1104- CP009087 serovar Enteritidis  
 2  
 OLF-SE1-1019- CP009083 serovar Enteritidis  
 1  
 OLF-SE6-00219 CP009088 serovar Enteritidis  
 -16  
 SEJ CP008928 serovar Enteritidis,  
 CMCC 50973 CP009049 serovar Paratyphi A, isolated from human in Jiangsu, China  
 CMCC 50503 CP009559 serovar Paratyphi A, isolated from human in Jiangsu, China  
 L-3553 AP014565 serovar Typhimurium, isolated from cattle in Hokkaido, Japan since  
 2004  
 EC20100134 CP007359 serovar Enteritidis, isolated from chicken in Ontario, Canada  
 EC20100130 CP007358 serovar Enteritidis, isolated from chicken in Ontario, Canada  
 CDC 06-0532 CP007211 serovar Anatum, isolated from human stool sample  
 ARS-USMARC- CP007216 serovar Newport, isolated from livestock fecal swab  
 1927  
 USDA-ARS-US CP007222 serovar Montevideo, isolated from ground beef  
 MARC-1903  
 USDA-ARS-US CP007235 serovar Typhimurium, isolated from ground beef  
 MARC-1899  
 LN649235 serovar Infantis, isolated from healthy chicken  
 SINFA  
 USDA-ARS-US CP007483 serovar Anatum, isolated from ground beef  
 MARC-1175  
 CDC CP007523 serovar Typhimurium, isolated from human stool sample  
 2011K-0870  
 USDA-ARS-US CP007540 serovar Montevideo, isolated from human stool sample  
 MARC-1921

|                          |                  |                                                                                                                                                                   |
|--------------------------|------------------|-------------------------------------------------------------------------------------------------------------------------------------------------------------------|
| CDC<br>2010K-2159        | CP007559         | serovar Newport, isolated from human stool sample                                                                                                                 |
| USDA-ARS-US<br>MARC-1735 | CP007584         | serovar Anatum, isolated from bovine pre-evisceration carcass of <i>Bos taurus</i>                                                                                |
| FORC_015                 | CP011365         | serovar Typhimurium, isolated from human blood culture in Korea                                                                                                   |
| YU39                     | CP011428         | Serovar Typhimurium, isolated from a male 8 year old suffering from hepatomegaly and severe thrombocytopenia                                                      |
| <i>Streptococcus</i>     |                  |                                                                                                                                                                   |
| <i>pyogenes</i>          |                  |                                                                                                                                                                   |
| M1 GAS                   | AE004092         | Serovar M1, a strict human pathogen that was isolated from a patient with a wound infection                                                                       |
| MGAS10270                | CP000260         | Serovar M2, for comparative genome analysis                                                                                                                       |
| MGAS10394                | CP000003         | Serovar M6, a Serovar M6 isolate cultured from a child with pharyngitis in private elementary school in Pennsylvania                                              |
| MGAS10750                | CP000262         | Serovar M4, for comparative genome analysis                                                                                                                       |
| MGAS2096                 | CP000261         | Serovar M12, for comparative genome analysis                                                                                                                      |
| MGAS315                  | AE014074         | Serovar M3, a Serovar M3 strain                                                                                                                                   |
| MGAS6180                 | CP000056         | Serovar M28, isolated from an invasive disease in Texas in 1998                                                                                                   |
| MGAS8232                 | AE009949         | Serovar M18, associated with acute rheumatic fever outbreaks in the USA                                                                                           |
| MGAS9429                 | CP000259         | Serovar M12, for comparative genome analysis                                                                                                                      |
| NZ131                    | CP000829         | Serovar M49, isolated from a patient with acute glomerulonephritis                                                                                                |
| SSI-1                    | BA000034         | Serovar M3, isolated from a toxic-shock patient in Japan and associated with severe invasive infections, necrotizing fasciitis, and death                         |
| Manfredo                 | AM29500          | Serovar M5, associated with acute rheumatic fever isolated from a patient in the 1950's in Chicago                                                                |
| Alab49                   | CP003068         | Serovar M53, recovered from an impetigo lesion in Alabama in 1986                                                                                                 |
| MGAS15252                | CP003116         | Serovar M59, group A streptococcus, caused an epidemic of severe invasive human infections, spread west to east across Canada over a 3-year period (2006 to 2008) |
| MGAS1882                 | CP003121         | Serovar M59, strain deposited in the BEI Resources as NR-33708                                                                                                    |
| HKU<br>QMH11M09079<br>01 | AFRY010<br>00001 | Serovar M12, bacteremic strain from a patient with scarlet fever in Hong Kong                                                                                     |
| A20                      | CP003901         | Serovar M1, isolated from a blood sample from a patient with necrotizing fasciitis in Tainan Provincial Hospital                                                  |
| M1 476                   | AP012491         | Serovar M1, isolated from a patient with streptococcal toxic shock syndrome during pregnancy                                                                      |

|            |          |                                                                                                                                       |
|------------|----------|---------------------------------------------------------------------------------------------------------------------------------------|
| HSC5       | CP006366 | Serovar M14, a robust producer of the cysteine protease SpeB and is capable of producing infection in several different animal models |
| STAB901    | CP007024 | Serovar M44, group A streptococcus, Tetracycline-resistant, isolated from the blood of a patient with endometritis                    |
| STAB902    | CP007041 | Serovar M3, isolated from a superficial pyodermitis                                                                                   |
| ATCC 19615 | CP008926 | Group A nonmotile $\beta$ -hemolytic clinical isolate is used for quality control in a variety of commercially available tests        |
| M23ND      | CP008695 | Serovar M23, isolated from an invasive human infection                                                                                |
| 7F7        | CP007240 | Serovar M83, isolated among homeless persons in Brittany, France                                                                      |
| HKU360     | CP009612 | Serovar M12, isolated from Scarlet fever outbreak between 2005-2011 in Hong Kong and mainland China                                   |
| 1E1        | CP007241 | Serovar M44, isolated from human sample in Brittany, France                                                                           |
| AP1        | CP007537 | Serovar M1, isolated from a blood bacteremia infected patient                                                                         |
| JRS4       | CP011414 | Serovar M6, a streptomycin-resistant derivative strain from the Rockefeller University Lancefield collection with rheumatic fever     |
| D471       | CP011415 | Serovar M6, a strain from the Rockefeller University Lancefield collection with rheumatic fever                                       |
| NGAS743    | CP007560 | Isolated from human sample                                                                                                            |
| NGAS596    | CP007561 | Isolated from human sample                                                                                                            |
| NGAS327    | CP007562 | Isolated from human sample                                                                                                            |
| MGAS5005   | CP000017 | Serovar M1, GroupA streptococcus, isolated from a clinical specimen of cerebrospinal fluid in Toronto, Canada in 1996                 |
| 5448       | CP008776 | Serovar M1, clinical strain                                                                                                           |
| M28PF1     | CP011535 | Serovar M28, isolated from a patient with postpartum endometritis                                                                     |

---
